# Supplementary material for: Towards a Better Understanding of Delamination of Multilayer Flexible Packaging Films by Carboxylic Acids
Source: PubMed Central journal article supplement — ChemSusChem. 2021 Feb 10;14(19):4198–213. doi: 10.1002/cssc.202002877 (PMC8518906; doi:10.1002/cssc.202002877), 2021-02-10
Supplement: CSSC-14-4198-s001.pdf [file CSSC-14-4198-s001.pdf]

# ChemSusChem

## Supporting Information

### **Towards a Better Understanding of Delamination of Multilayer Flexible Packaging Films by Carboxylic Acids**

Sibel Ügdüler, Tobias De Somer, Kevin M. Van Geem, Martijn Roosen, Andreas Kulawig, Ralf Leineweber, and Steven De Meester\*This publication is part of a collection of invited contributions focusing on "Chemical Upcycling of Waste Plastics". Please visit [to view all contributions](#). © 2021 The Authors. ChemSusChem published by Wiley-VCH GmbH. This is an open access article under the terms of the Creative Commons Attribution Non-Commercial NoDerivs License, which permits use and distribution in any medium, provided the original work is properly cited, the use is non-commercial and no modifications or adaptations are made.

1  
2

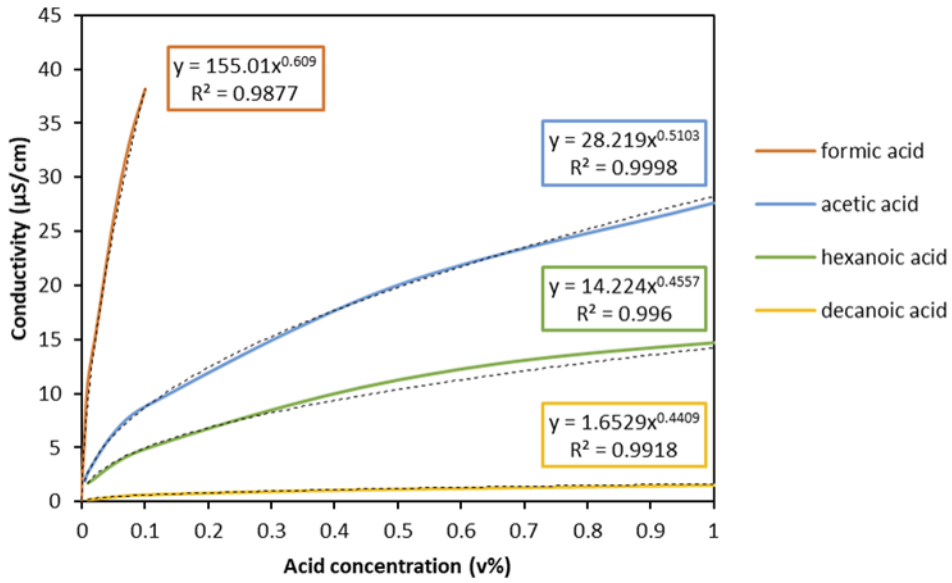

3  
4  
5  
6  
7

**Figure S1.** Calibration curves of formic acid, acetic acid, hexanoic acid and decanoic acid used for conversions of conductivity values to acid concentration.

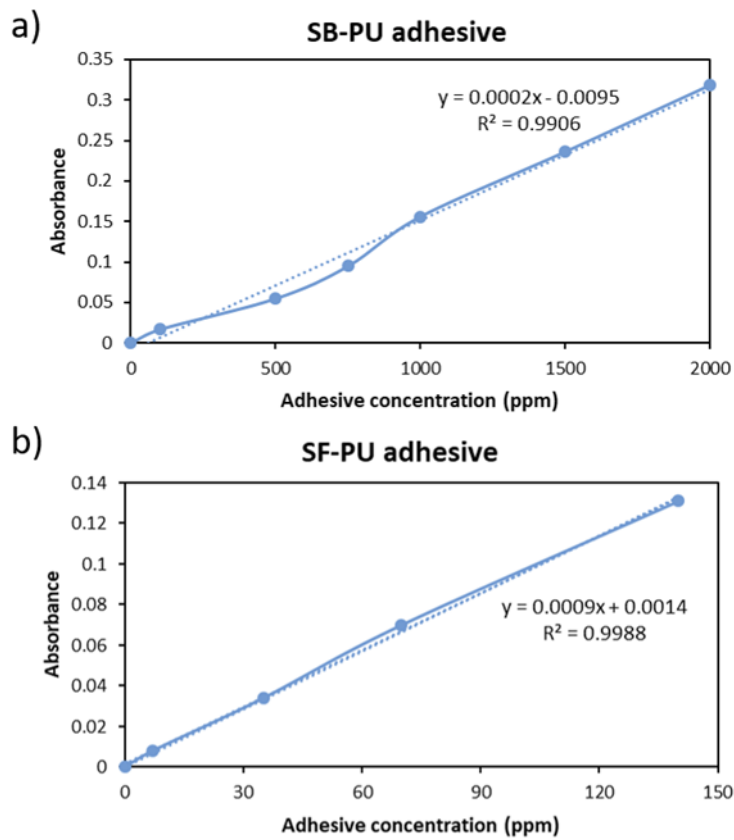

8  
9  
10

**Figure S2.** Calibration curves of a) SB-PU adhesive; b) SF-PU adhesive used to follow dissolution kinetics of adhesives in formic acid medium.

11 **Table S1.** The diffusion coefficient constant,  $D_0$  and the activation energy of the diffusivity,  $E_d$  of each constituent  
 12 polymer layer and the boundary layer, calculated via pseudorandom-search algorithm.

|                                  | corona<br>PET<br>(Type A) | corona<br>PET<br>(Type B) | chemPET   | PE trans. | PE white  | PP        | Boundary<br>layer |
|----------------------------------|---------------------------|---------------------------|-----------|-----------|-----------|-----------|-------------------|
| $D_0$ [ $\text{cm}^2/\text{s}$ ] | 4.40E-02                  | 4.70E+08                  | 2.90E-06  | 1.58E+03  | 5.41E+25  | 3.93E+24  | 4.36E-11          |
| $E_d$ [ $\text{J/mol}$ ]         | -6.11E+04                 | -1.24E+05                 | -3.43E+04 | -8.99E+04 | -2.40E+05 | -2.31E+05 | -1.12E+05         |

13

14

15 **Table S2.** The density and acid concentration of formic acid ( $\text{mg}/\text{cm}^3$ ) at different temperature and volumes.

| V%<br>aci<br>d | at 25 °C                                             |                                                  | at 50 °C                                             |                                                  | at 65 °C                                             |                                                  | at 75 °C                                             |                                                  |
|----------------|------------------------------------------------------|--------------------------------------------------|------------------------------------------------------|--------------------------------------------------|------------------------------------------------------|--------------------------------------------------|------------------------------------------------------|--------------------------------------------------|
|                | density of<br>mixture<br>[ $\text{mg}/\text{cm}^3$ ] | $C_{\text{acid}}$<br>[ $\text{mg}/\text{cm}^3$ ] | density of<br>mixture<br>[ $\text{mg}/\text{cm}^3$ ] | $C_{\text{acid}}$<br>[ $\text{mg}/\text{cm}^3$ ] | density of<br>mixture<br>[ $\text{mg}/\text{cm}^3$ ] | $C_{\text{acid}}$<br>[ $\text{mg}/\text{cm}^3$ ] | density of<br>mixture<br>[ $\text{mg}/\text{cm}^3$ ] | $C_{\text{acid}}$<br>[ $\text{mg}/\text{cm}^3$ ] |
| 0              | 1027.45                                              | 0                                                | 1004.29                                              | 0                                                | 990.04                                               | 0                                                | 980.38                                               | 0                                                |
| 10             | 1046.11                                              | 121.40                                           | 1022.06                                              | 118.20                                           | 1007.23                                              | 116.20                                           | 997.24                                               | 114.90                                           |
| 20             | 1064.76                                              | 242.80                                           | 1039.83                                              | 236.40                                           | 1024.43                                              | 232.40                                           | 1014.10                                              | 229.80                                           |
| 30             | 1083.42                                              | 364.20                                           | 1057.60                                              | 354.60                                           | 1041.62                                              | 348.60                                           | 1030.96                                              | 344.70                                           |
| 40             | 1102.07                                              | 485.60                                           | 1075.37                                              | 472.80                                           | 1058.82                                              | 464.80                                           | 1047.82                                              | 459.60                                           |
| 50             | 1120.73                                              | 607.00                                           | 1093.14                                              | 591.00                                           | 1076.02                                              | 581.00                                           | 1064.69                                              | 574.50                                           |
| 60             | 1139.38                                              | 728.40                                           | 1110.92                                              | 709.20                                           | 1093.21                                              | 697.20                                           | 1081.55                                              | 689.40                                           |
| 70             | 1158.04                                              | 849.80                                           | 1128.69                                              | 827.40                                           | 1110.41                                              | 813.40                                           | 1098.41                                              | 804.30                                           |
| 75             | 1167.36                                              | 910.50                                           | 1137.57                                              | 886.50                                           | 1119.01                                              | 871.50                                           | 1106.84                                              | 861.75                                           |
| 80             | 1176.69                                              | 971.20                                           | 1146.46                                              | 945.60                                           | 1127.61                                              | 929.60                                           | 1115.28                                              | 919.20                                           |
| 85             | 1186.02                                              | 1031.90                                          | 1155.34                                              | 1004.70                                          | 1136.20                                              | 987.70                                           | 1123.71                                              | 976.65                                           |
| 90             | 1195.34                                              | 1092.60                                          | 1164.23                                              | 1063.80                                          | 1144.80                                              | 1045.80                                          | 1132.14                                              | 1034.10                                          |
| 100            | 1214.00                                              | 1214.00                                          | 1182.00                                              | 1182.00                                          | 1162.00                                              | 1162.00                                          | 1149.00                                              | 1149.00                                          |

16

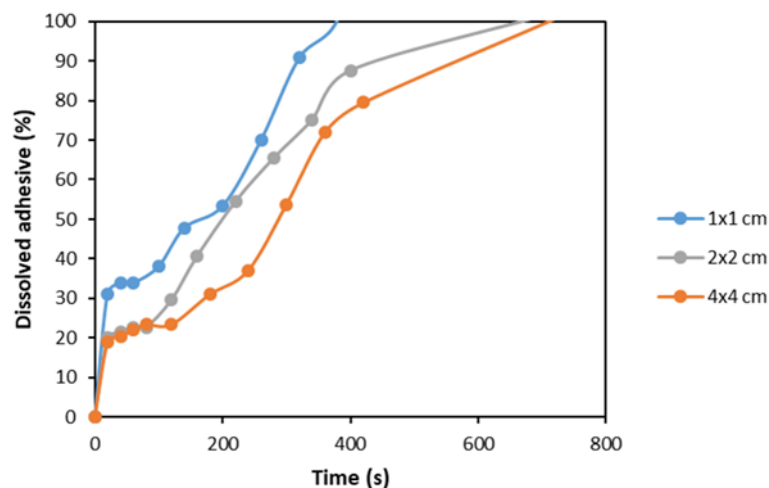

17 **Figure S3.** Delamination rate of sample B at different particle sizes under the same experimental conditions (at  
 18 100 °C, 100 v% formic acid, at 0.005 g/mL S/L ratio, stirring with a rotor at 400 rpm).  
 19

20

21 **Table S3.** SSE and TIC values of each case study.

| sample | experimental conditions                         | SSE         | TIC      |
|--------|-------------------------------------------------|-------------|----------|
| A      | at 75 °C, 100 v% formic acid, 0.005 g/mL of S/L | 0.025904067 | 0.173062 |
| B      | at 75 °C, 100 v% formic acid, 0.005 g/mL of S/L | 0.039762245 | 0.279267 |
| C      | at 75 °C, 100 v% formic acid, 0.005 g/mL of S/L | 0.002199464 | 0.154795 |
| D      | at 75 °C, 100 v% formic acid, 0.005 g/mL of S/L | 0.007381892 | 0.192268 |
| E      | at 75 °C, 100 v% formic acid, 0.005 g/mL of S/L | 0.001049302 | 0.126724 |
| D      | at 50 °C, 100 v% formic acid, 0.005 g/mL of S/L | 0.001744452 | 0.085850 |
| D      | at 65 °C, 100 v% formic acid, 0.005 g/mL of S/L | 0.004474732 | 0.114847 |
| B      | at 75 °C, 85 v% formic acid, 0.005 g/mL of S/L  | 0.004011534 | 0.066406 |
| B      | at 75 °C, 75 v% formic acid, 0.005 g/mL of S/L  | 0.004723954 | 0.148119 |
| B      | at 75 °C, 50 v% formic acid, 0.005 g/mL of S/L  | 0.001650758 | 0.187504 |
| B      | at 75 °C, 100 v% formic acid, 0.12 g/mL of S/L  | 2.758340187 | 0.101994 |
| D      | at 75 °C, 100 v% formic acid, 0.025 g/mL of S/L | 0.151356729 | 0.249143 |

22
